# Supplementary material
Source: publisher figshare collection journal article supplement (https://karger.figshare.com/articles/dataset/_/5123077)
Supplement: Supplementary file 2 [file 1 › 000334515_sm_Table.pdf]

# Supplementary Table 1: Genes, gonadal function or localization, accession number of rainbow trout sequences, and qPCR primers

Sequences of the Sigenae contigs can be found at the following address: [http://public-contigbrowser.sigenae.org:9090/Oncorhynchus\\_mykiss/index.html](http://public-contigbrowser.sigenae.org:9090/Oncorhynchus_mykiss/index.html)

Most of the information about genes function or localization referred here are based on studies in mammal species.

| Gene   | Full Name                               | Gonadal function or localization                                                                                                                                                                                                                                                              | Ref.                                                      | Accession number                  | Primer Forward         | Primer Reverse          |
|--------|-----------------------------------------|-----------------------------------------------------------------------------------------------------------------------------------------------------------------------------------------------------------------------------------------------------------------------------------------------|-----------------------------------------------------------|-----------------------------------|------------------------|-------------------------|
| wnt2   | wingless-type MMTV integration site 2   | - expressed in granulosa cells during folliculogenesis<br>- regulates granulosa cells proliferation                                                                                                                                                                                           | 1; 2;<br>3                                                | Sigenae:<br>FYV3OTN01B98XS.p.om.8 | GGAGTGCCAACATCAGTTTCAG | ATACACAAAGGCTGCTTCACGA  |
| wnt3   | wingless-type MMTV integration site 3   | - detected in mouse ovary at birth                                                                                                                                                                                                                                                            | 15                                                        | Sigenae:<br>GB5RBPX01DPZJD.p.om.8 | CTGTGGTCCATCATTCTGTCC  | ATCTTCCACTGGTGCTGCTAC   |
| wnt4a1 | wingless-type MMTV integration site 4a1 | - expressed in differentiating gonads of various vertebrates species<br><br>- key gene in ovarian differentiation in mammals<br>inhibits testosterone synthesis, and testicular vasculature formation<br>- implicated in folliculogenesis in mammals<br><br>- required for testis development | 4; 5; 6; 7;<br>8<br><br>4; 9; 10;<br><br>11; 12<br><br>13 | Genbank: JF815553                 | CCACGGAGTCAGTCCAGAA    | TACTCCTCTCCCTCACATCAACA |
| wnt5a  | wingless-type MMTV integration site 5   | - expressed in both male and female embryonic gonads in mouse<br>- in granulosa cells                                                                                                                                                                                                         | 14<br>15                                                  | Genbank: CU074815                 | GCATCAGGGAGTGTCACTATCA | CTGCTTCCTATCTGCATGACC   |
| wnt6   | wingless-type MMTV integration site 6   | - expressed in both male and female genital ridges in mouse                                                                                                                                                                                                                                   | 16                                                        | Genbank: JN187949                 | CTCAACTTGCCCTGTTTTTCAT | GCTTGGTCTTCCTGCAGATACT  |
| wnt7b  | wingless-type MMTV integration site 7b  | - expressed in mouse developping ovary                                                                                                                                                                                                                                                        | 15                                                        | Genbank: JN187950                 | AAGGATGAGGAAGATCTGTGGA | AGAAAGCGGACATTGTTCAT    |
| wnt9b  | wingless-type MMTV integration site 9b  | - expressed in mouse developping ovary                                                                                                                                                                                                                                                        | 15                                                        | Genbank: CU066549                 | ACTAGCAAAGGCTTGCAGCTC  | TATTTCAAGTTGTCACCGCAGA  |
| wnt11  | wingless-type MMTV integration site 11  | - expressed in granulosa cells and in oocytes                                                                                                                                                                                                                                                 | 15; 17                                                    | Genbank: CU063997                 | GAGACGTTGAGTGGCAGTGA   | AAAGCTGCAGTGGCATTTCT    |

|               |                                                          |                                                                                                                                                                                                                             |                                |                                |                        |                           |
|---------------|----------------------------------------------------------|-----------------------------------------------------------------------------------------------------------------------------------------------------------------------------------------------------------------------------|--------------------------------|--------------------------------|------------------------|---------------------------|
| <i>rspo1</i>  | <i>r-spondin 1</i>                                       | <ul style="list-style-type: none"> <li>- over-expressed in differentiating ovary of various vertebrates</li> <li>- key gene in ovarian differentiation in mammals</li> <li>- positively regulates Wnt4 signaling</li> </ul> | 5; 18; 19<br>20; 21;<br>22; 23 | Genbank: JN187947              | GGTCAGCACCAGGGACTATG   | CTGTCCCTTTGAGAGATTGAGG    |
| <i>fzd1</i>   | <i>frizzled 1</i>                                        | <ul style="list-style-type: none"> <li>- expressed in granulosa cells during late folliculogenesis</li> <li>- in theca cells</li> </ul>                                                                                     | 11                             | Sigenae: CA381602.p.om.8       | ATGACTCTGATCGTGGGGATAA | CAGACCATTACACTGTGGTCT     |
| <i>fzd2</i>   | <i>frizzled 2</i>                                        | <ul style="list-style-type: none"> <li>- expressed in human cumulus cells</li> </ul>                                                                                                                                        | 2                              | Sigenae: CB498179.p.om.8       | CAACAGCCTGAACCCCATAC   | AAGGAGGTACCGATGAAGAGGT    |
| <i>fzd3</i>   | <i>frizzled 3</i>                                        | <ul style="list-style-type: none"> <li>- expressed in human cumulus cells</li> </ul>                                                                                                                                        | 2                              | Sigenae: GAY7CUQ01A5IU3.p.om.8 | GATGTCCCTCTGGACTTCCTC  | GCAAAGATAGTGTGGTGAACGA    |
| <i>fzd4</i>   | <i>frizzled 4</i>                                        | <ul style="list-style-type: none"> <li>- expressed in granulosa cells</li> <li>- implicated in corpus luteum formation</li> </ul>                                                                                           | 1; 11; 24                      | Genbank: BX875207              | CGACGAGACAGAGGAGATGAC  | CGTCTGACTGCAGGACGTT       |
| <i>fzd7</i>   | <i>frizzled 7</i>                                        | <ul style="list-style-type: none"> <li>- expressed in mouse developping ovary and oocytes</li> </ul>                                                                                                                        | 15                             | Genbank: CX030042              | CAGAGTTGGTGCAGGTTTTACA | TCCTCCACATTAACTTCCACA     |
| <i>fzd8</i>   | <i>frizzled 8</i>                                        | unknown                                                                                                                                                                                                                     |                                | Genbank: CA363645              | AATTGCTGGACATGAACAAGTG | AAGTAGAAAAACAATGGTACAAAGC |
| <i>lrp5</i>   | low density lipoprotein receptor-related protein 5       | <ul style="list-style-type: none"> <li>- expressed in mouse developping ovary and oocytes</li> </ul>                                                                                                                        | 15                             | Genbank: CX033605              | TGGAGACAAGAGGAGGGAGA   | ACTGCAGGGAGTTGGATGT       |
| <i>lrp6</i>   | low density lipoprotein receptor-related protein 6       | <ul style="list-style-type: none"> <li>- expressed in mouse developping ovary and oocytes</li> <li>- in granulosa cells</li> </ul>                                                                                          | 15                             | Genbank: BX879658              | ACCCGGGAAGAGGGTACAT    | TTGTCAATGATCATGGCTCTGT    |
| <i>tcf7</i>   | <i>t-cell factor 7</i>                                   | <ul style="list-style-type: none"> <li>- over-expressed in differentiating ovary in rainbow trout</li> </ul>                                                                                                                | 25                             | Genbank: JN187948              | GCATCATTCACCCAGGTTCT   | TTCAGTGTGAGGCAGTCCAG      |
| <i>tcf7l2</i> | transcription factor 7-like 2 (T-cell specific, HMG-box) | unknown                                                                                                                                                                                                                     |                                | Genbank: CA343767              | CCCTAACACGAGAGGAGCAG   | CTGGGTAGAGCTGCATGTGA      |
| <i>lef1</i>   | lymphoid enhancer-binding factor 1                       | <ul style="list-style-type: none"> <li>- expressed in granulosa cells</li> </ul>                                                                                                                                            | 15                             | Genbank: CX036511              | TTACAGGACGGAATTAAATTGG | CCTGTATTGTGGCAGTGACATT    |
| <i>axin2</i>  | <i>axin2</i>                                             | <ul style="list-style-type: none"> <li>- target gene of the canonical Wnt pathway, over-expressed in differentiating ovary</li> </ul>                                                                                       | 20; 26                         | Genbank: CU071534              | GTGGATCCTGGAGAGTGACC   | GCCACCATACGCCTTCTTAG      |

|               |                                              |                                                                                                                                                                                                                                                                                                                                                                    |                     |                   |                        |                        |
|---------------|----------------------------------------------|--------------------------------------------------------------------------------------------------------------------------------------------------------------------------------------------------------------------------------------------------------------------------------------------------------------------------------------------------------------------|---------------------|-------------------|------------------------|------------------------|
| <i>ctnnb1</i> | <i>beta-catenin</i>                          | <ul style="list-style-type: none"> <li>- implicated in ovarian differentiation</li> <li>- expressed in granulosa cells during folliculogenesis</li> <li>- promotes preovulatory follicular development</li> <li>- activated during testis development</li> <li>- promotes proliferation and stemness regulation of spermatogonial stem/progenitor cells</li> </ul> | 27; 28<br>29<br>30  | Genbank: CA341830 | CACAGAGCTGCTTCACTCCA   | GTGAGCTCCACAGACAGACG   |
| <i>fst</i>    | <i>follicle-stimulating hormone receptor</i> | <ul style="list-style-type: none"> <li>- implicated in ovarian differentiation, acts downstream of Wnt4</li> <li>- expressed in rainbow trout differentiating ovary</li> </ul>                                                                                                                                                                                     | 20; 28;<br>31<br>32 | Genbank: CA364762 | ACAAAGACGAGTGCGCGTTGCT | CGGCAGGTCTTCTTGCATTGTC |

## References (Ref):

- 1- Ricken A, Lochhead P, Kontogiannia M, Farookhi R: Wnt signaling in the ovary: identification and compartmentalized expression of wnt-2, wnt-2b, and frizzled-4 mRNAs. *Endocrinology* 143:2741-2749 (2002).
- 2- Wang HX, Tekpetey FR, Kidder GM: Identification of WNT/beta-CATENIN signaling pathway components in human cumulus cells. *Mol Hum Reprod* 15:11-17 (2009).
- 3- Wang HX, Li TY, Kidder GM: WNT2 regulates DNA synthesis in mouse granulosa cells through beta-catenin. *Biol Reprod* 82:865-875 (2010).
- 4- Vainio S, Heikkila M, Kispert A, Chin N, McMahon AP: Female development in mammals is regulated by Wnt-4 signalling. *Nature* 397:405-409 (1999).
- 5- Smith CA, Shoemaker CM, Roeszler KN, Queen J, Crews D et al: Cloning and expression of *R-Spondin1* in different vertebrates suggests a conserved role in ovarian development. *BMC Dev Biol* 8:72 (2008).

- 6- Tripathi V, Raman R: Identification of *Wnt4* as the ovary pathway gene and temporal disparity of its expression vis-a-vis testis genes in the garden lizard, *Calotes versicolor*. *Gene* 449:77-84 (2010).
- 7- Yu H, Pask AJ, Shaw G, Renfree MB: Differential expression of WNT4 in testicular and ovarian development in a marsupial. *BMC Dev Biol* 6:44. (2006).
- 8- Wu GC, Chang CF: wnt4 Is associated with the development of ovarian tissue in the protandrous black Porgy, *Acanthopagrus schlegeli*. *Biol Reprod*. 81:1073-1082 (2009).
- 9- Jordan BK, Shen JH, Olaso R, Ingraham HA, Vilain E: Wnt4 overexpression disrupts normal testicular vasculature and inhibits testosterone synthesis by repressing steroidogenic factor 1/beta-catenin synergy. *Proc Natl Acad Sci U S A* 100:10866-10871 (2003).
- 10- Heikkilä M, Prunskaitė R, Naillat F, Itäranta P, Vuoristo J, Leppäluoto J, Peltoketo H, Vainio S: The partial female to male sex reversal in Wnt-4-deficient females involves induced expression of testosterone biosynthetic genes and testosterone production, and depends on androgen action. *Endocrinology* 146:4016-4023 (2005).
- 11- Hsieh M, Johnson MA, Greenberg NM, Richards JS: Regulated expression of Wnts and Frizzleds at specific stages of follicular development in the rodent ovary. *Endocrinology* 143:898-908 (2002).
- 12- Boyer A, Lapointe E, Zheng X, Cowan RG, Li H, Quirk SM, DeMayo FJ, Richards JS, Boerboom D: WNT4 is required for normal ovarian follicle development and female fertility. *FASEB J* 24:3010-3025 (2010).
- 13- Jeays-Ward K, Dandonneau M, Swain A: Wnt4 is required for proper male as well as female sexual development. *Dev Biol* 276:431-440 (2004).
- 14- Bouma GJ, Hart GT, Washburn LL, Recknagel AK, Eicher EM: Using real time RT-PCR analysis to determine multiple gene expression patterns during XX and XY mouse fetal gonad development. *Gene Expr Patterns* 5:141-149 (2004).
- 15- Harwood BN, Cross SK, Radford EE, Haac BE, De Vries WN: Members of the WNT signaling pathways are widely expressed in mouse ovaries,

oocytes, and cleavage stage embryos. Dev Dyn 237:1099-1111 (2008).

16- Cory AT, Boyer A, Pilon N, Lussier JG, Silversides DW: Presumptive pre-Sertoli cells express genes involved in cell proliferation and cell signalling during a critical window in early testis differentiation. Mol Reprod Dev 74:1491-1504 (2007).

17- Tao Q, Yokota C, Puck H, Kofron M, Birsoy B et al: Maternal *wnt11* activates the canonical wnt signaling pathway required for axis formation in *Xenopus* embryos. Cell 120:857-871 (2005).

18- Kocer A, Pinheiro I, Pannetier M, Renault L, Parma P, Radi O, Kim KA, Camerino G, Pailhoux E: R-spondin1 and FOXL2 act into two distinct cellular types during goat ovarian differentiation. BMC Dev Biol 8:36 (2008).

19- Zhang Y, Li F, Sun D, Liu J, Liu N et al: Molecular analysis shows differential expression of *R-spondin1* in zebrafish (*Danio rerio*) gonads. Mol Biol Rep 38:275-282 (2011).

20- Chassot AA, Ranc F, Gregoire EP, Roepers-Gajadien HL, Taketo MM et al: Activation of beta-catenin signaling by Rspo1 controls differentiation of the mammalian ovary. Hum Mol Genet 17:1264-1277 (2008).

21- Parma P, Radi O, Vidal V, Chaboissier MC, Dellambra E et al: R-spondin1 is essential in sex determination, skin differentiation and malignancy. Nat Genet 38:1304-1309 (2006).

22- Tomizuka K, Horikoshi K, Kitada R, Sugawara Y, Iba Y et al: R-spondin1 plays an essential role in ovarian development through positively regulating Wnt-4 signaling. Hum Mol Genet 17:1278-1291 (2008).

23- Tomaselli S, Megiorni F, Lin L, Mazzilli MC, Gerrelli D, Majore S, Grammatico P, Achermann JC: Human RSPO1/R-spondin1 is expressed during early ovary development and augments  $\beta$ -catenin signaling. PLoS One 6:16366 (2011).

24- Hsieh M, Boerboom D, Shimada M, Lo Y, Parlow AF, Luhmann UF, Berger W, Richards JS: Mice null for *Frizzled4* (*Fzd4*<sup>-/-</sup>) are infertile and exhibit impaired corpora lutea formation and function. Biol Reprod 73:1135-1146 (2005).

25- Cavileer T, Hunter S, Okutsu T, Yoshizaki G, Nagler JJ: Identification of novel genes associated with molecular sex differentiation in the embryonic gonads of rainbow trout (*Oncorhynchus mykiss*). Sex Dev 3:214-224 (2009).

26- Lustig B, Jerchow B, Sachs M, Weiler S, Pietsch T et al: Negative feedback loop of Wnt signaling through upregulation of *conductin/axin2* in colorectal and liver tumors. Mol Cell Biol 22:1184-1193 (2002).

- 27- Maatouk DM, DiNapoli L, Alvers A, Parker KL, Taketo MM et al: Stabilization of beta-catenin in XY gonads causes male-to-female sex-reversal. Hum Mol Genet 17:2949-2955 (2008).
- 28- Liu CF, Bingham N, Parker K, Yao HH: Sex-specific roles of beta-catenin in mouse gonadal development. Hum Mol Genet 18:405-417 (2009).
- 29- Fan HY, O'Connor A, Shitanaka M, Shimada M, Liu Z et al: Beta-catenin (CTNNB1) promotes preovulatory follicular development but represses LH-mediated ovulation and luteinization. Mol Endocrinol 24:1529-1542 (2010).
- 30- Golestaneh N, Beauchamp E, Fallen S, Kokkinaki M, Uren A, Dym M: Wnt signaling promotes proliferation and stemness regulation of spermatogonial stem/progenitor cells. Reproduction 138:151-162 (2009).
- 31- Yao HH, Matzuk MM, Jorgez CJ, Menke DB, Page DC et al: Follistatin operates downstream of Wnt4 in mammalian ovary organogenesis. Dev Dyn 230:210-215 (2004).
- 32- Vizziano D, Randuineau G, Baron D, Cauty C, Guiguen Y: Characterization of early molecular sex differentiation in rainbow trout, *Oncorhynchus mykiss*. Dev Dyn 236:2198-2206 (2007).
